# Supplementary material for: AOD trends during 2001–2010 from observations and model simulations
Source: Copernicus journal article supplement (doi:10.5194/acp-15-5521-2015), 2015-05-21
Supplement: Supplementary file 1 [file acp-15-5521-2015-supplement.pdf]

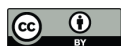

## *Supplement of*

# **AOD trends during 2001–2010 from observations and model simulations**

**A. Pozzer et al.**

*Correspondence to:* A. Pozzer ([andrea.pozzer@mpic.de](mailto:andrea.pozzer@mpic.de))

The copyright of individual parts of the supplement might differ from the CC-BY 3.0 licence.

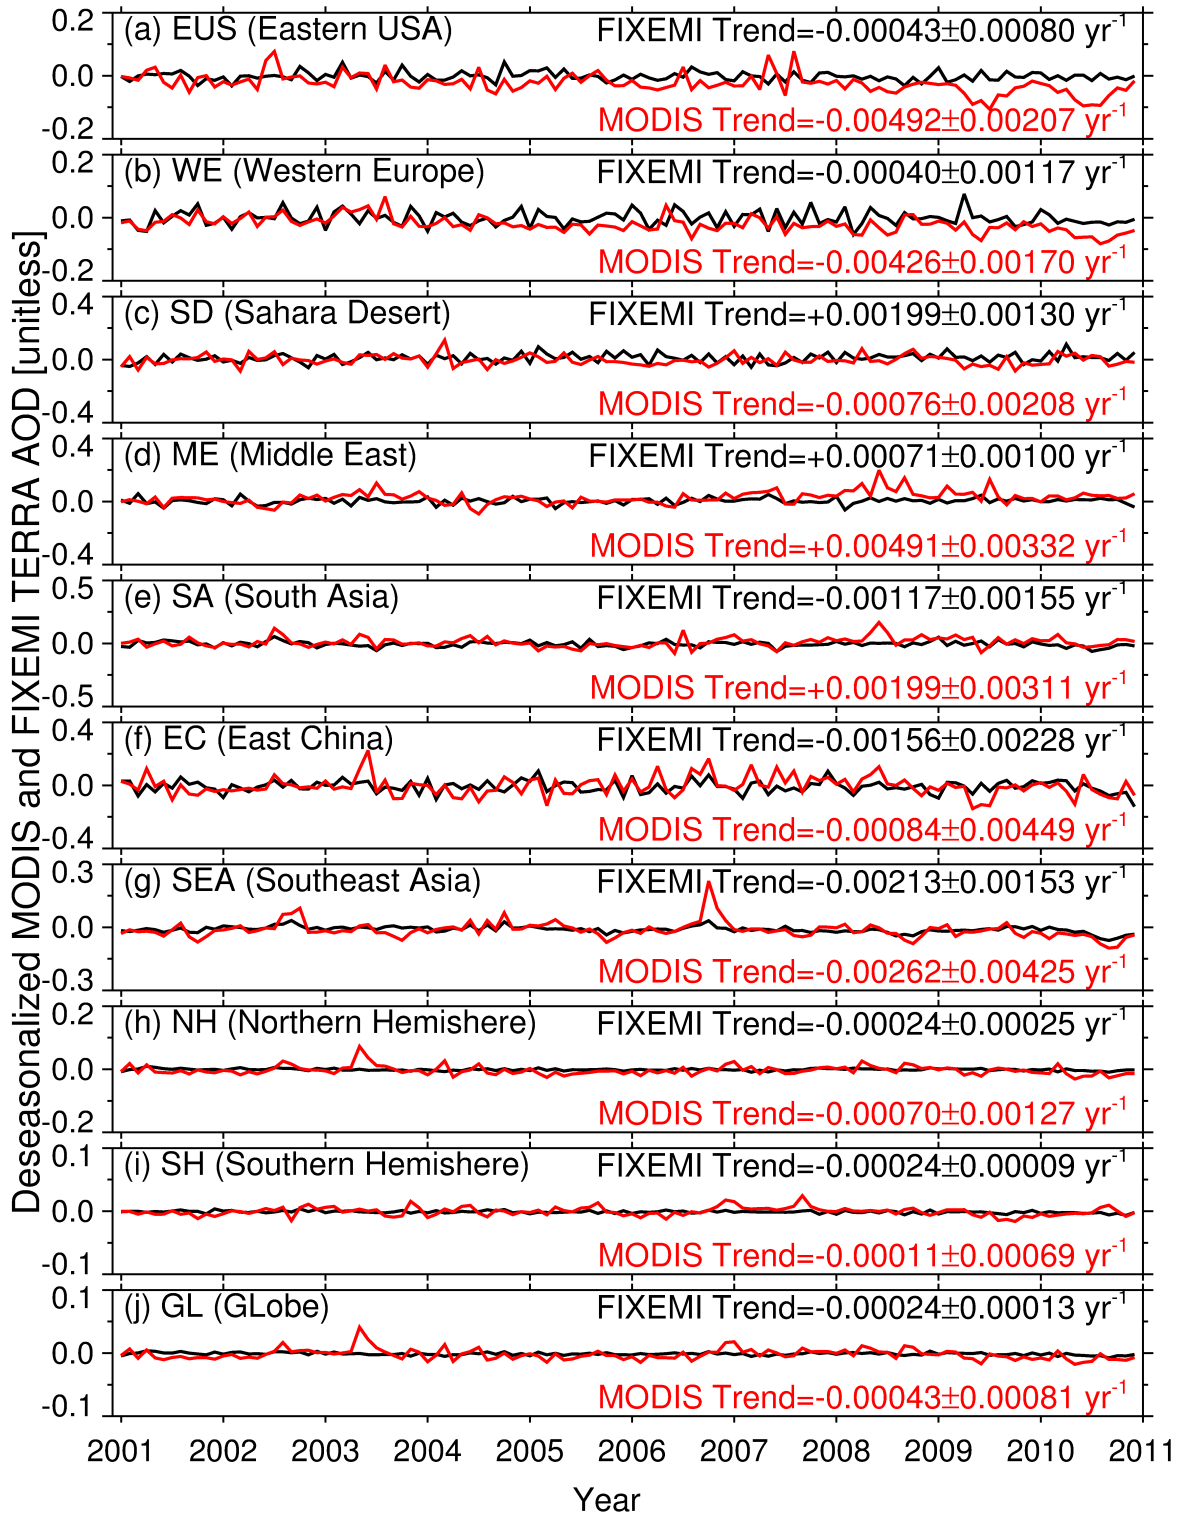

Figure 1: Time series of deseasonalized MODIS and FIXEMI AODs.

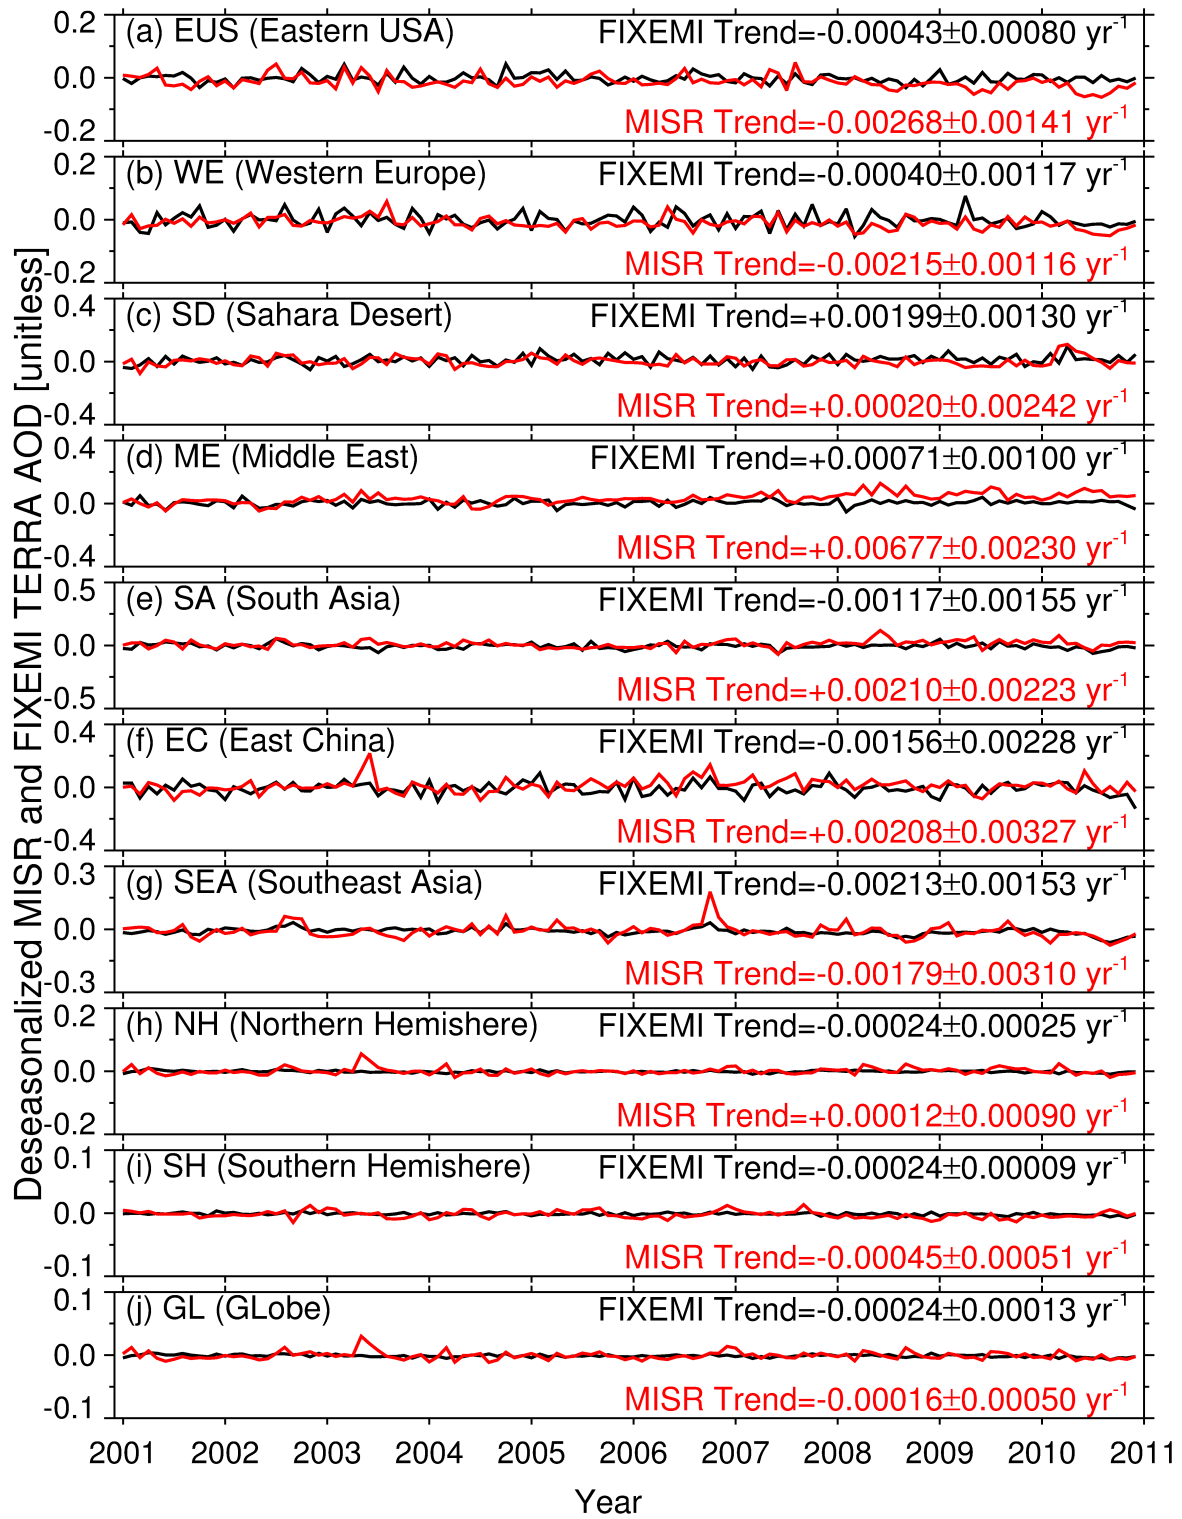

Figure 2: Time series of deseasonalized MISR and FIXEMI AODs.

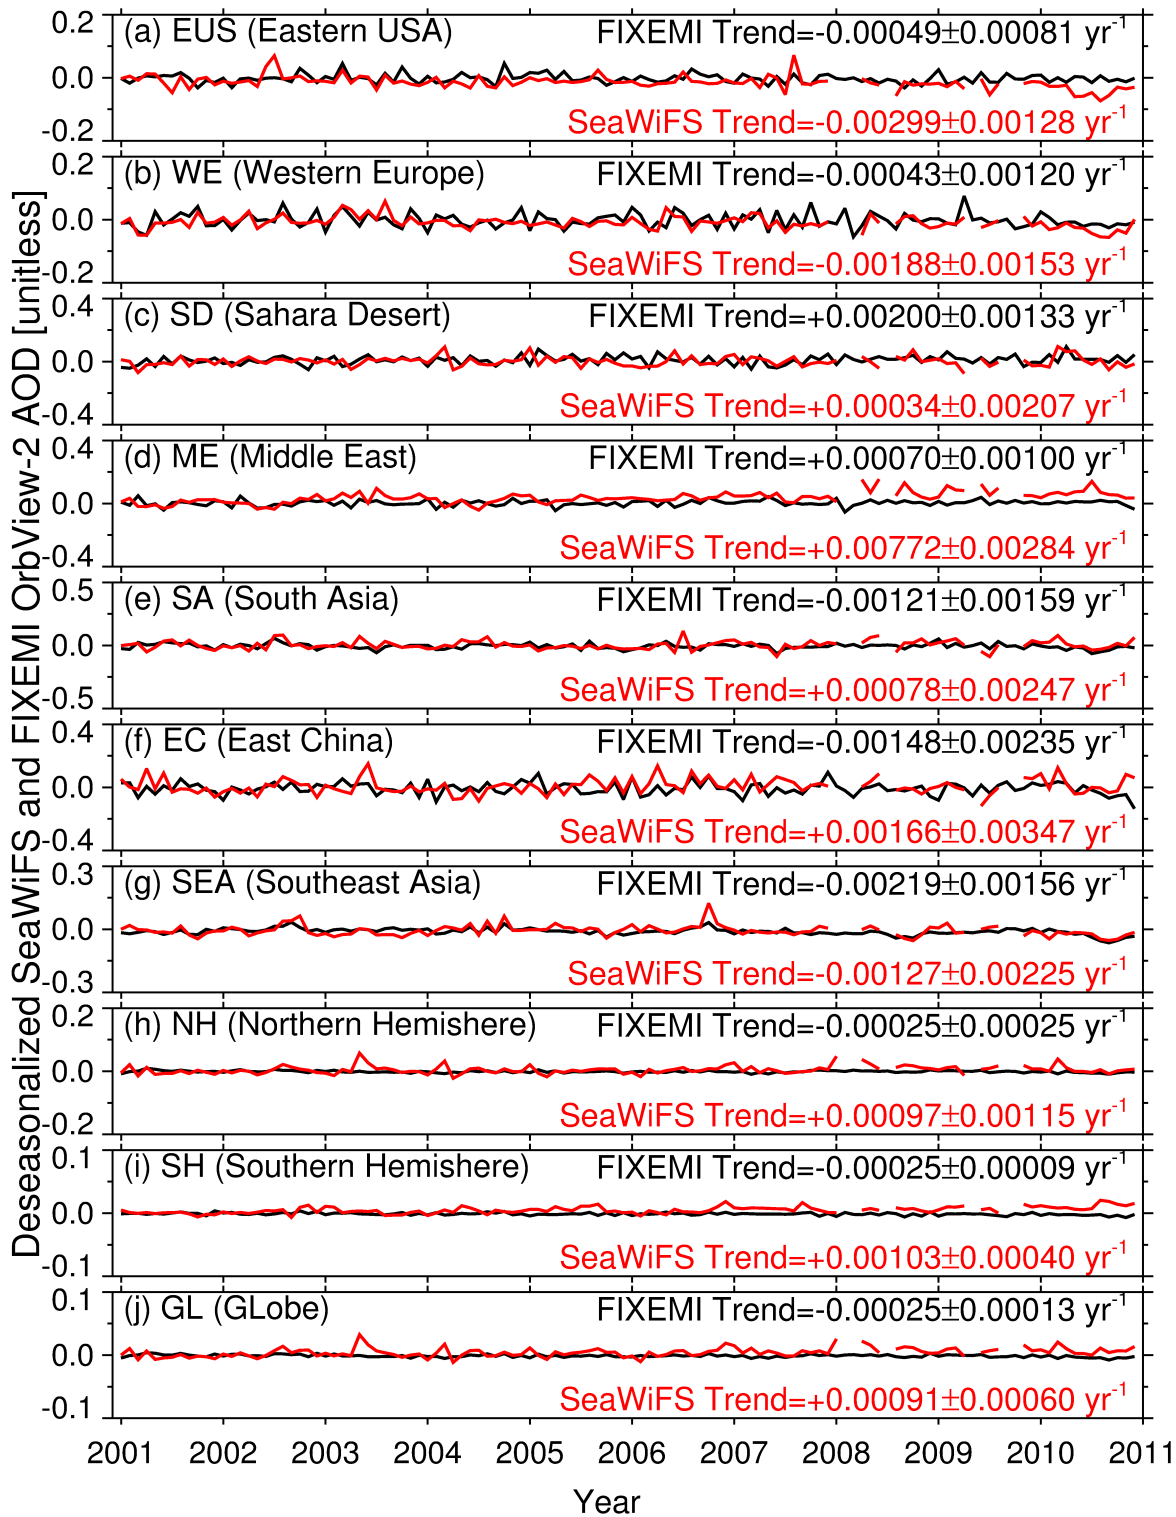

Figure 3: Time series of deseasonalized SeaWiFS and FIXEMI AODs.



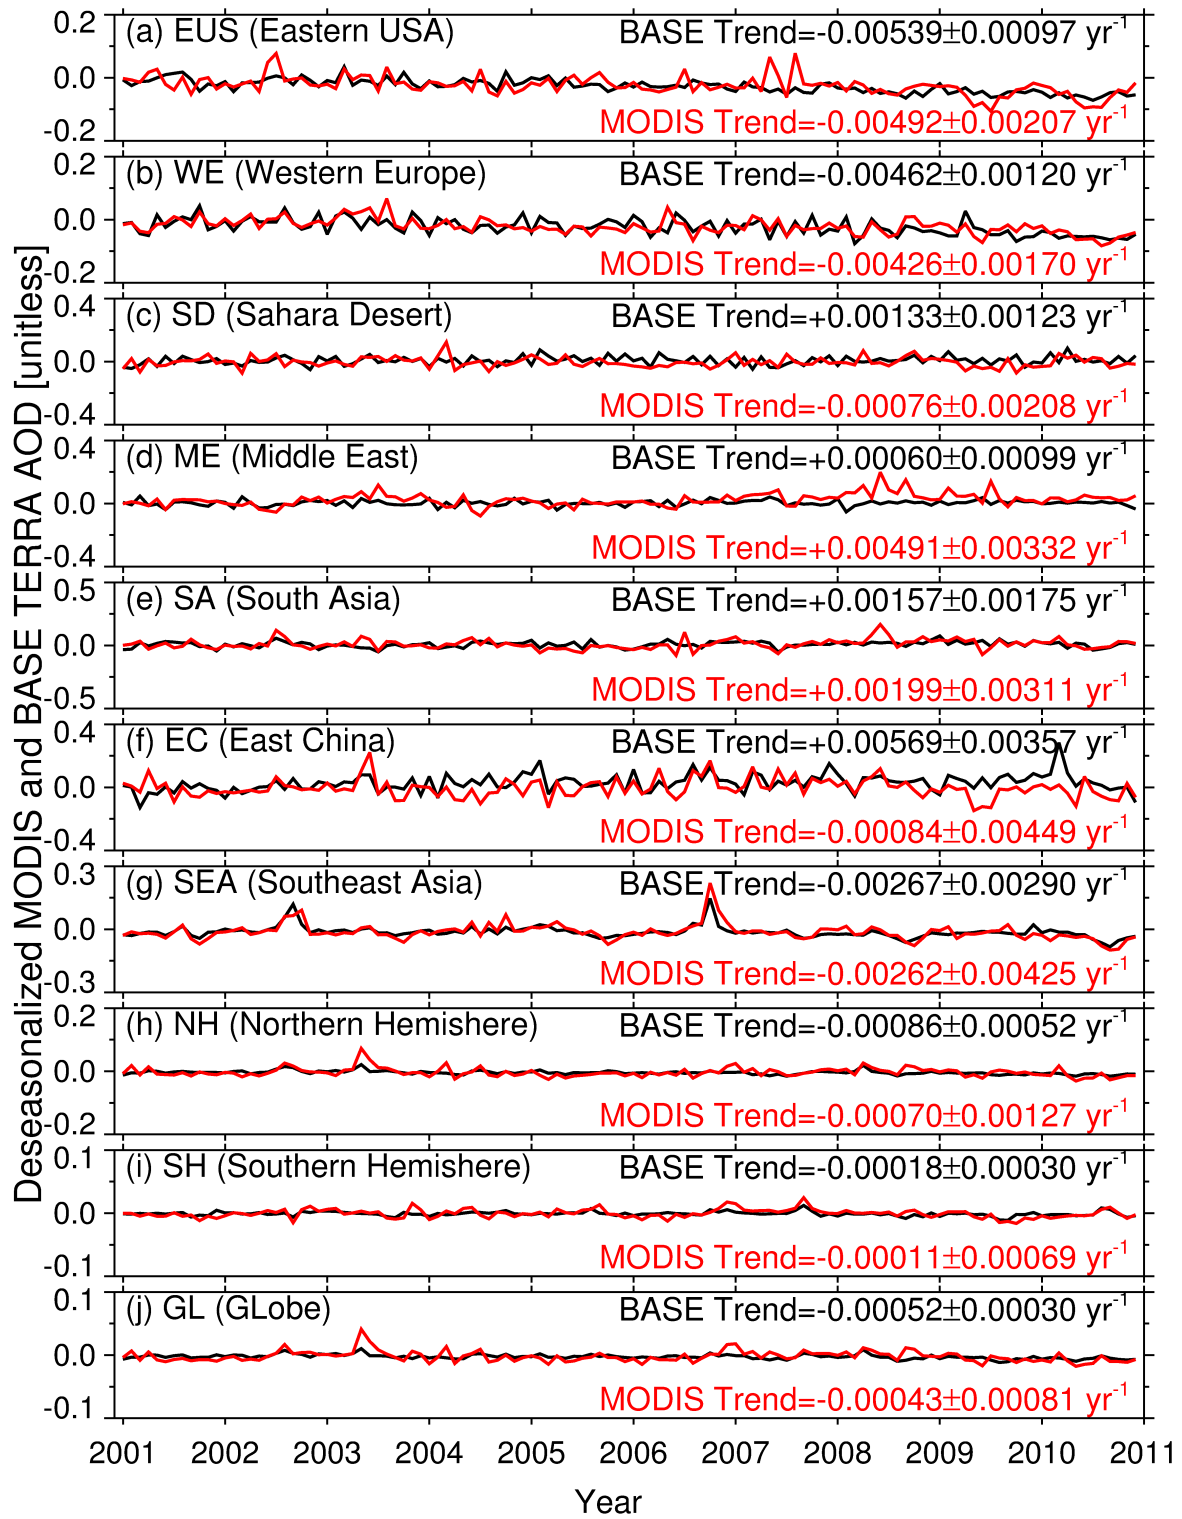

Figure 4: Time series of deseasonalized MODIS and BASE AODs.

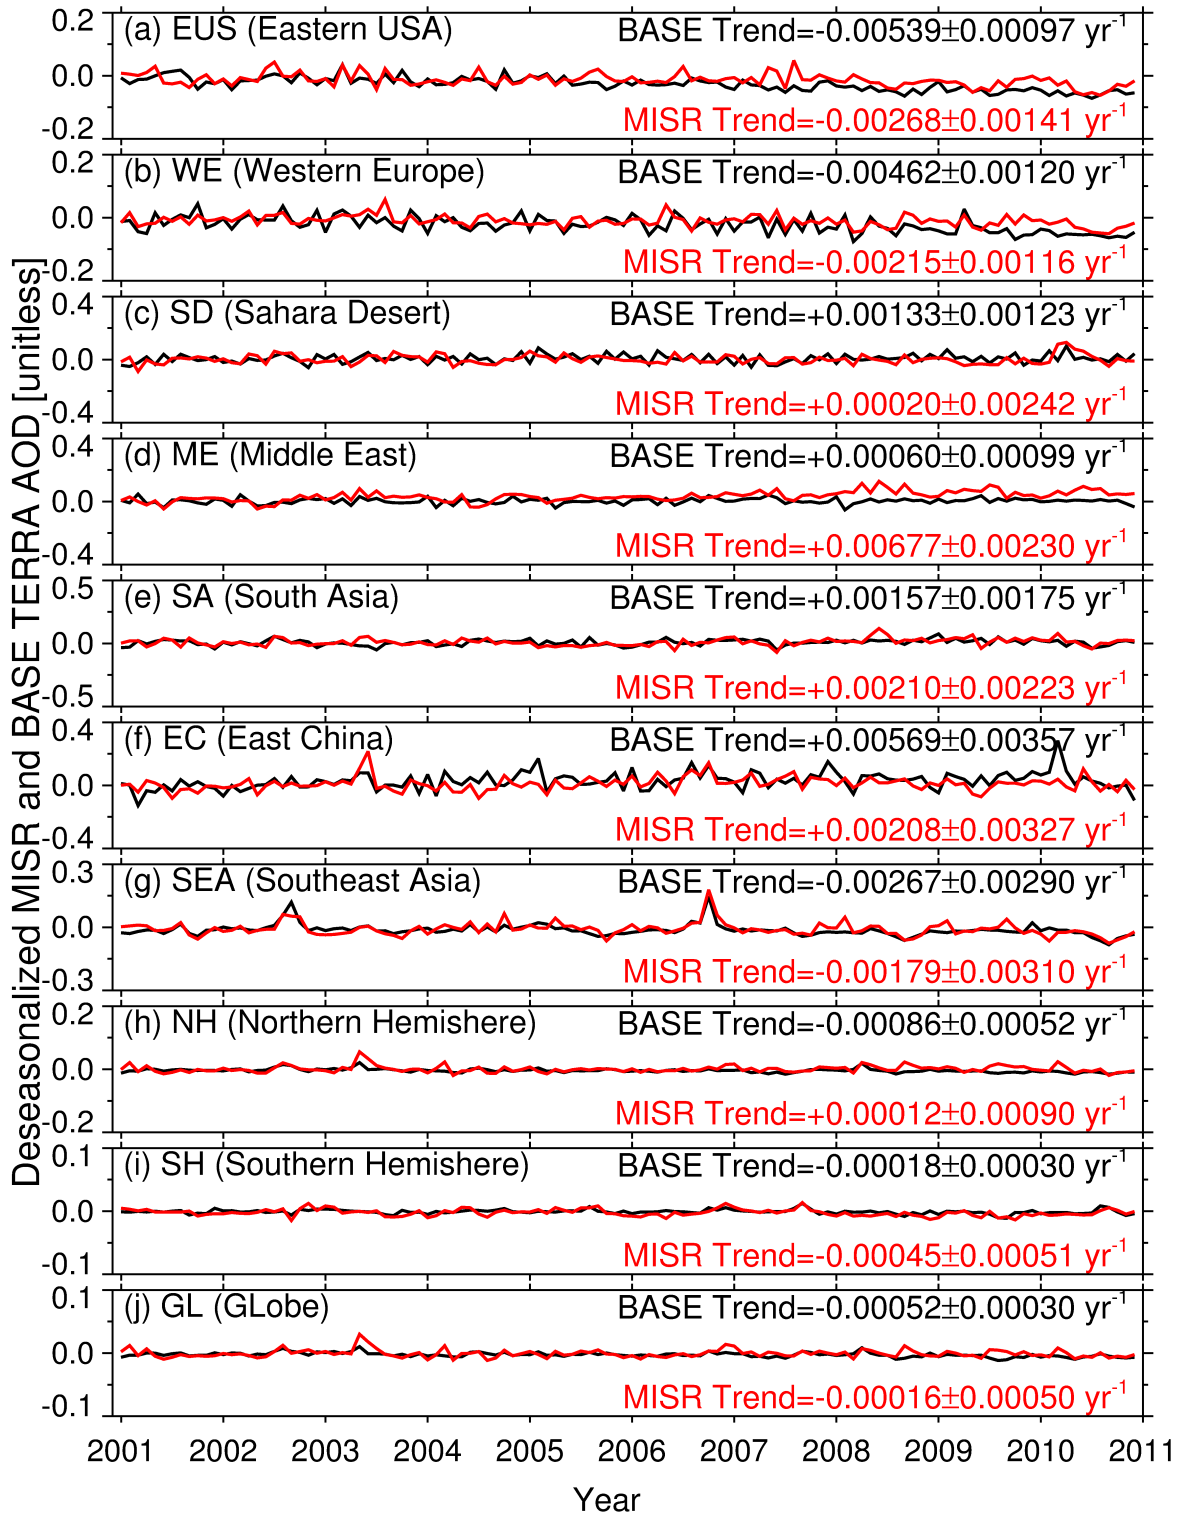

Figure 5: Time series of deseasonalized MISR and BASE AODs.

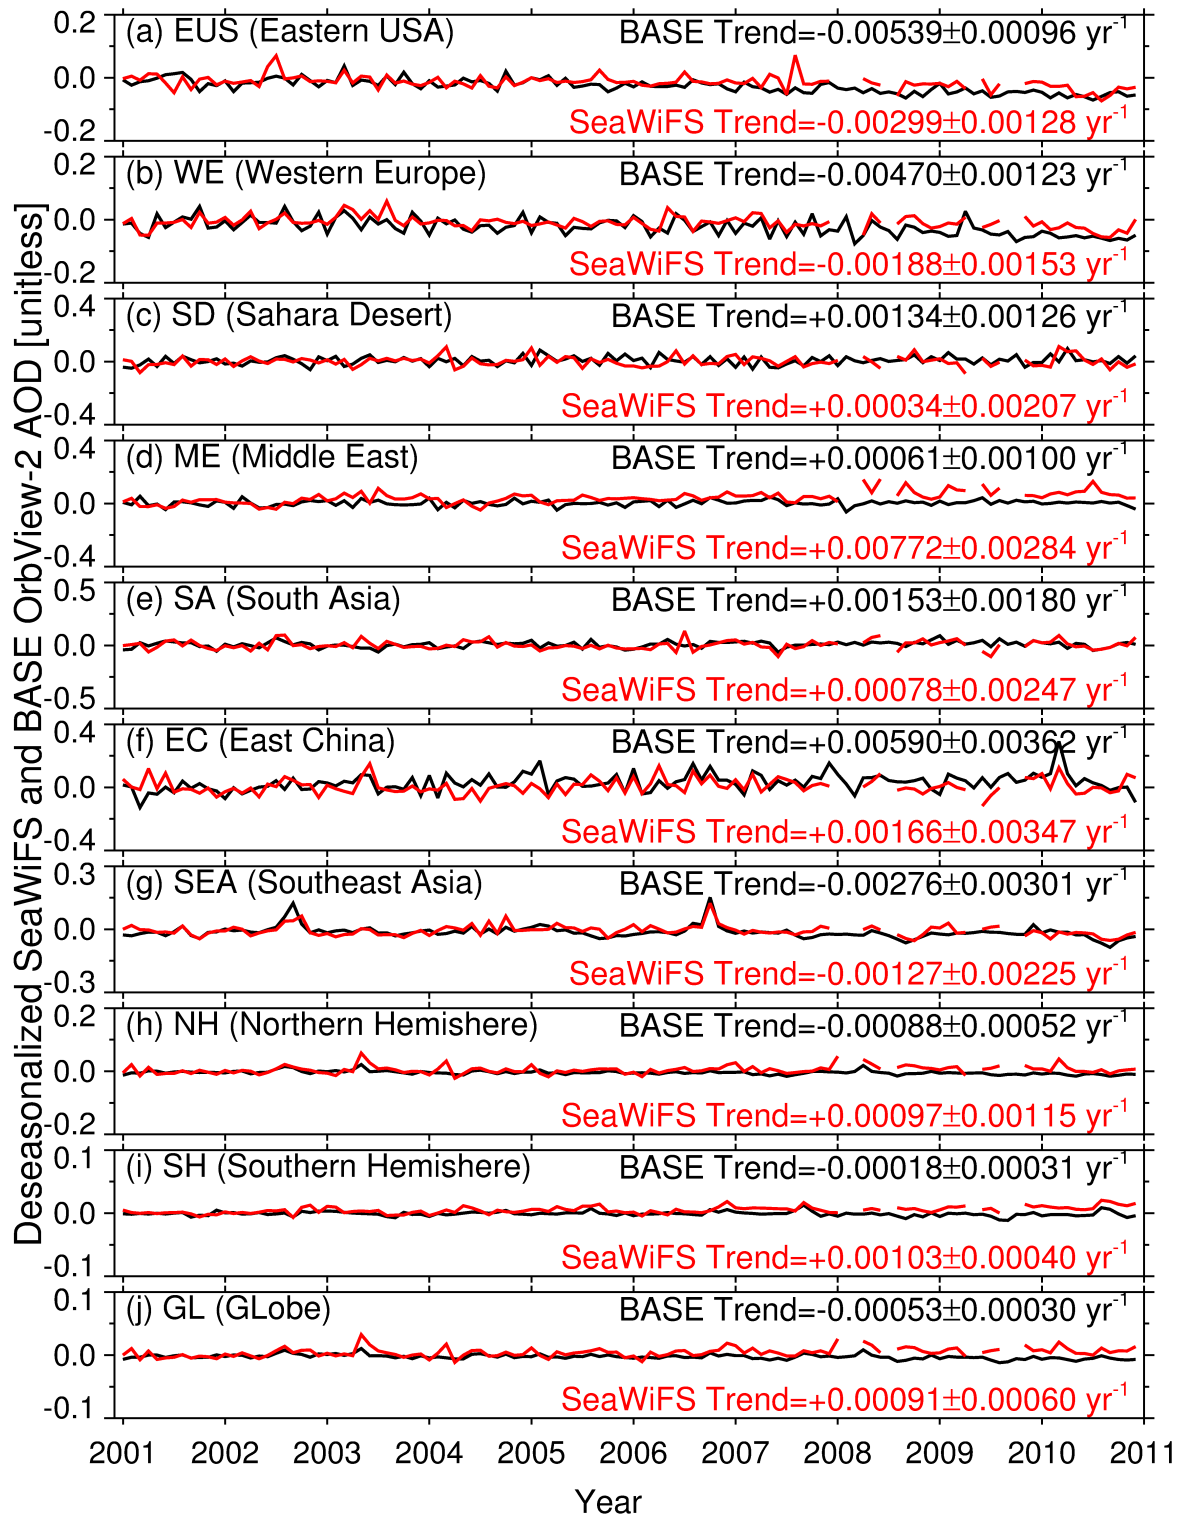

Figure 6: Time series of deseasonalized SeaWiFS and BASE AODs.

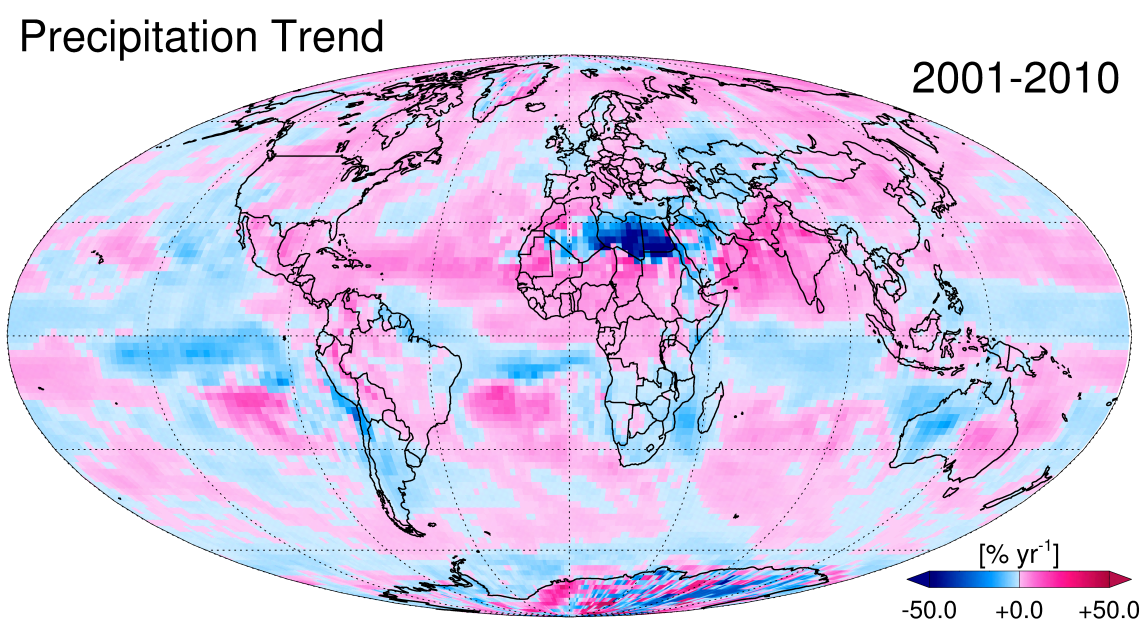

Figure 7: Linear trend in %/year for surface precipitation in simulations RCP85 and RCP00.

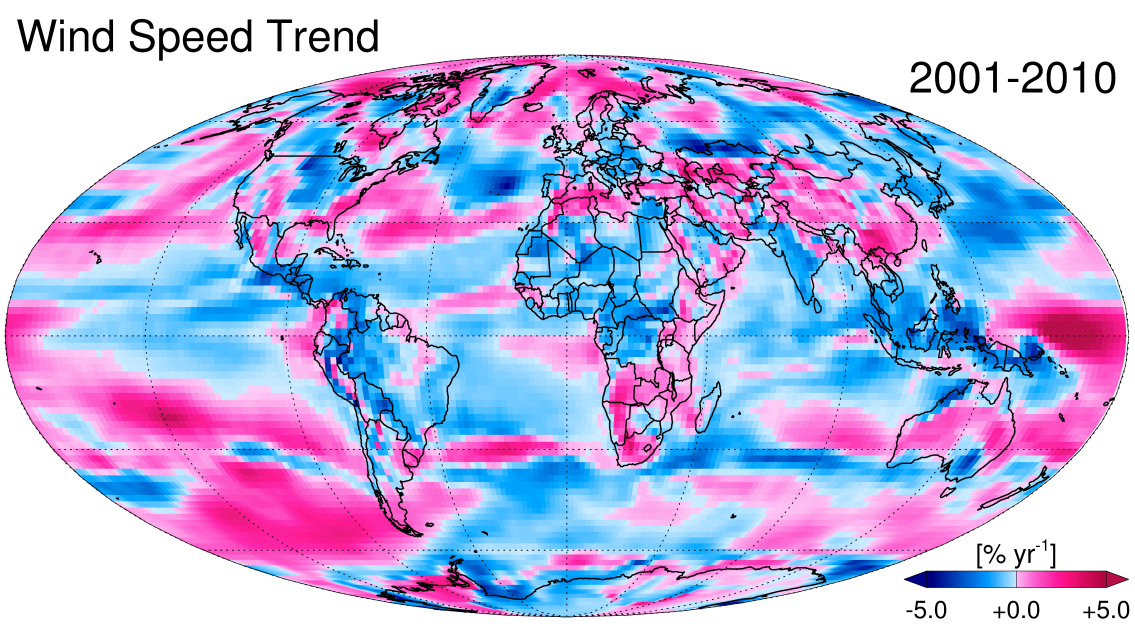

Figure 8: Linear trend in %/year for surface wind in simulations RCP85 and RCP00.

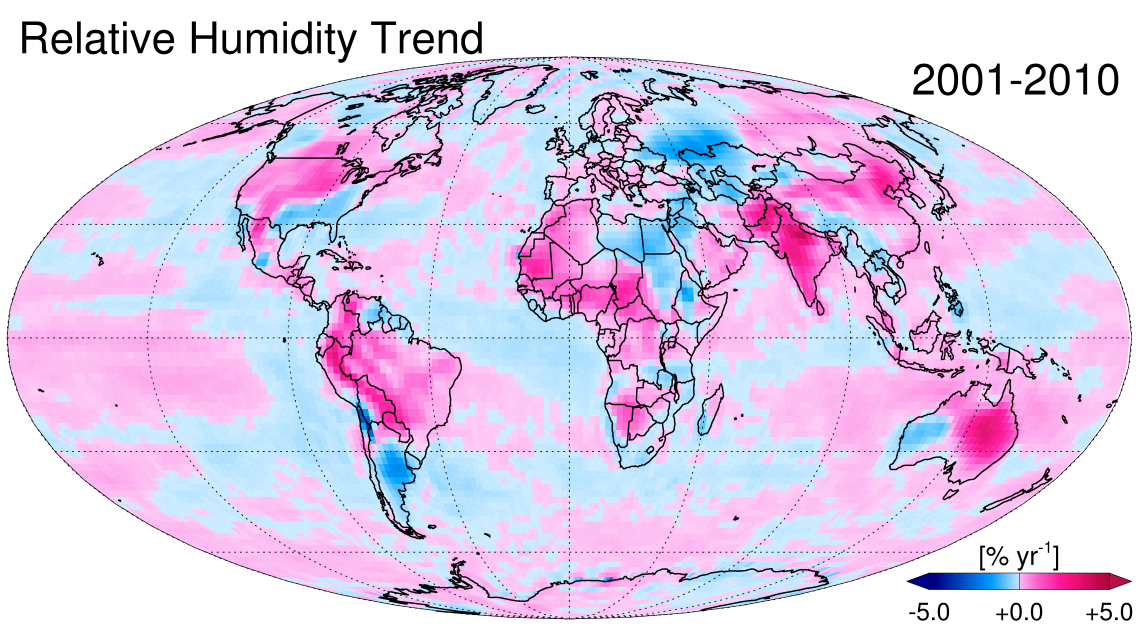

Figure 9: Linear trend in %/year for surface relative humidity in simulations RCP85 and RCP00.
